# Supplementary material for: A positive feedback loop driven by fibronectin and IL-1β sustains the inflammatory microenvironment in breast cancer
Source: Springer Nature journal article supplement (doi:10.1186/s13058-023-01629-0), 2023-03-15
Supplement: MOESM1 [file 24627630]

## Supplementary Material

Suppl. Table 1. Patient data.

|                                   |            |
|-----------------------------------|------------|
| <b>Total number (n)</b>           | 62         |
| <b>Age median (min-max)</b>       | 57 (41-92) |
| <b>Clinical stage</b>             |            |
| I                                 | 3          |
| II                                | 32         |
| III                               | 16         |
| IV                                | 1          |
| <b>Receptor Status</b>            |            |
| HR <sup>+</sup> HER2 <sup>-</sup> | 20         |
| HR <sup>+</sup> HER2 <sup>+</sup> | 15         |
| HR <sup>-</sup> HER2 <sup>+</sup> | 10         |
| HR <sup>-</sup> HER2 <sup>-</sup> | 17         |

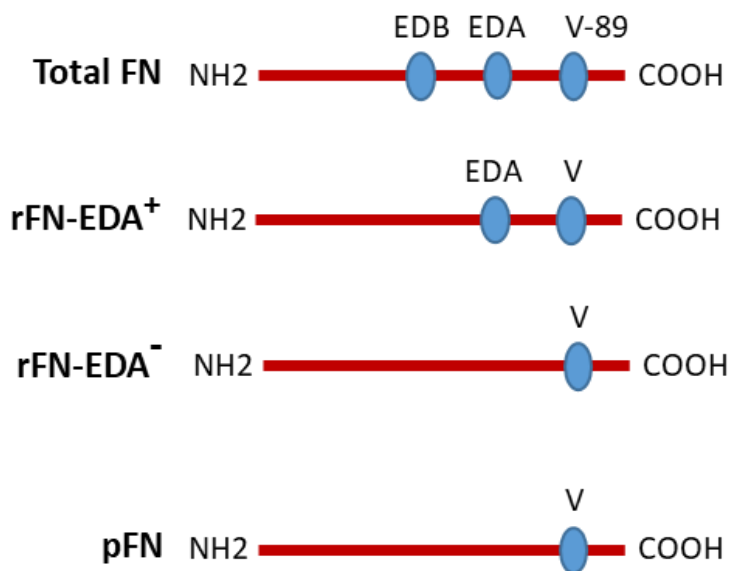

**Suppl. Fig. 1.** Graphic presentations of the fibronectin (FN) isoforms. The plasma fibronectin (pFN), the recombinant FN lacking the EDA domain (rFN-EDA<sup>-</sup>) and the recombinant FN with the EDA domain (rFN-EDA<sup>+</sup>) are shown in comparison to the total FN protein.

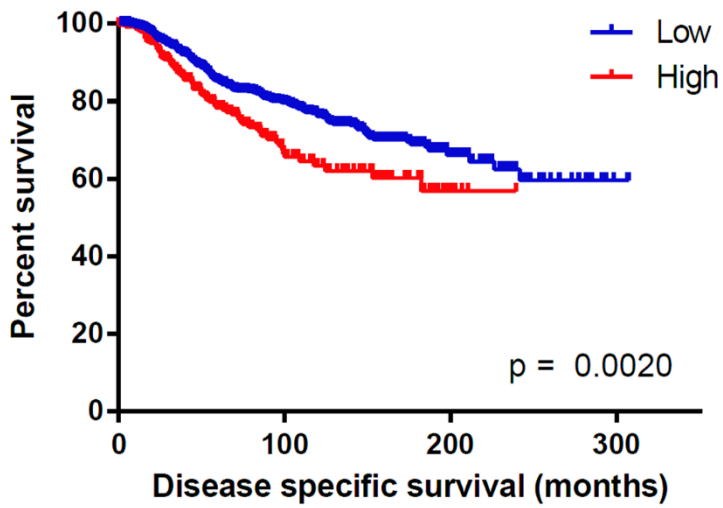

**Suppl. Fig. 2** Kaplan-Meier plot for the estimation of survival in breast cancer patients (n=995, from METABRIC database) with low and high total cellular FN expression.

### A HR<sup>-</sup>/HER2<sup>-</sup>

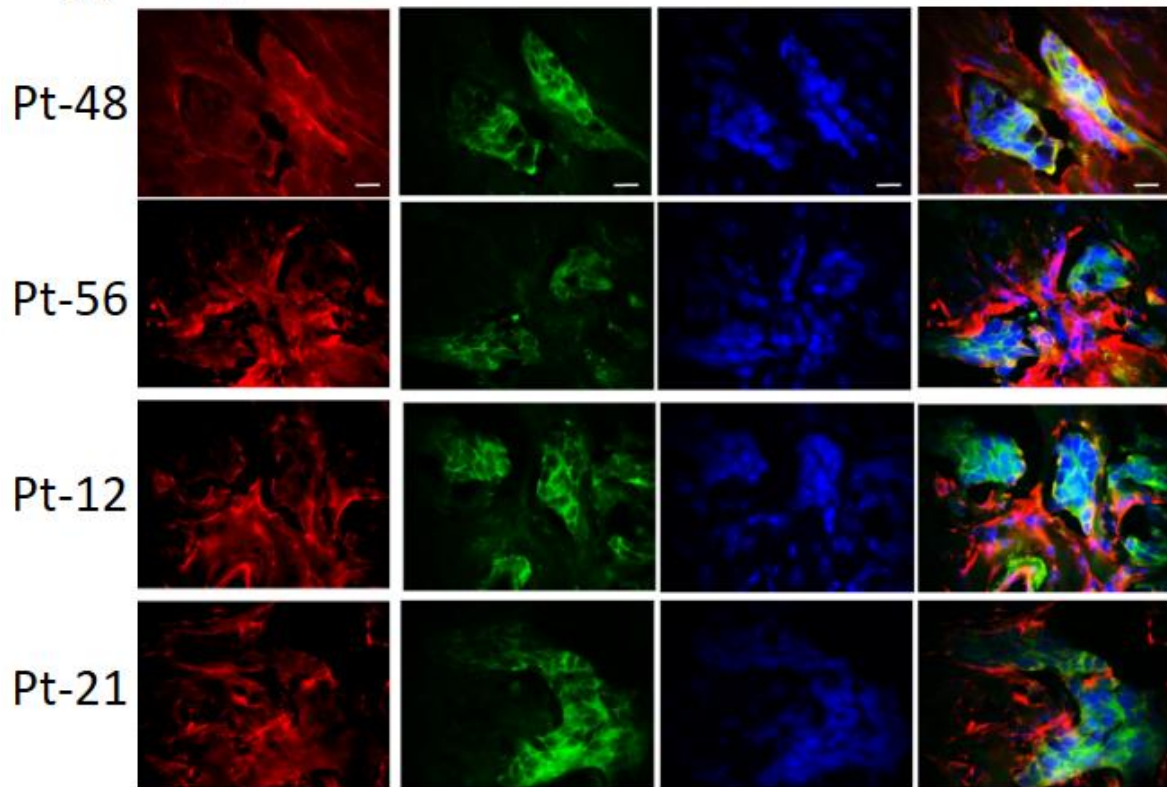

### B HR<sup>-</sup>/HER2<sup>+</sup>

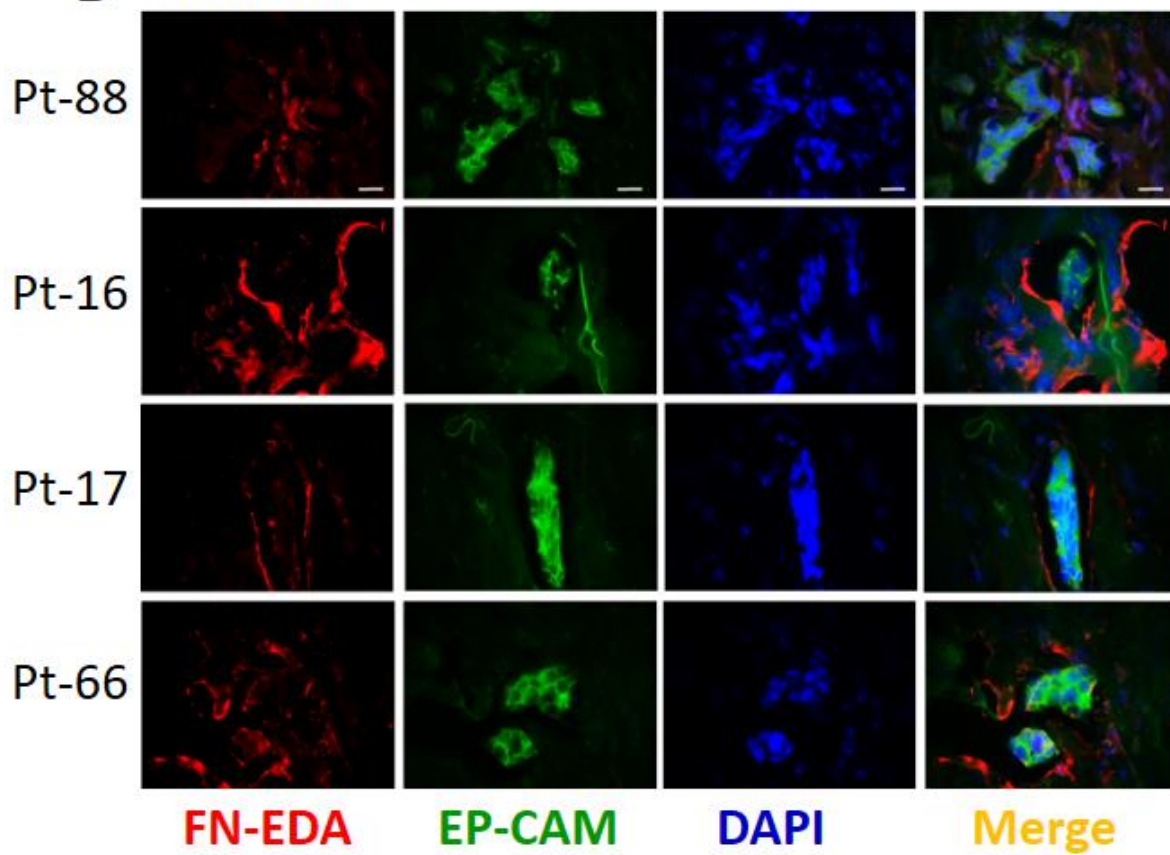

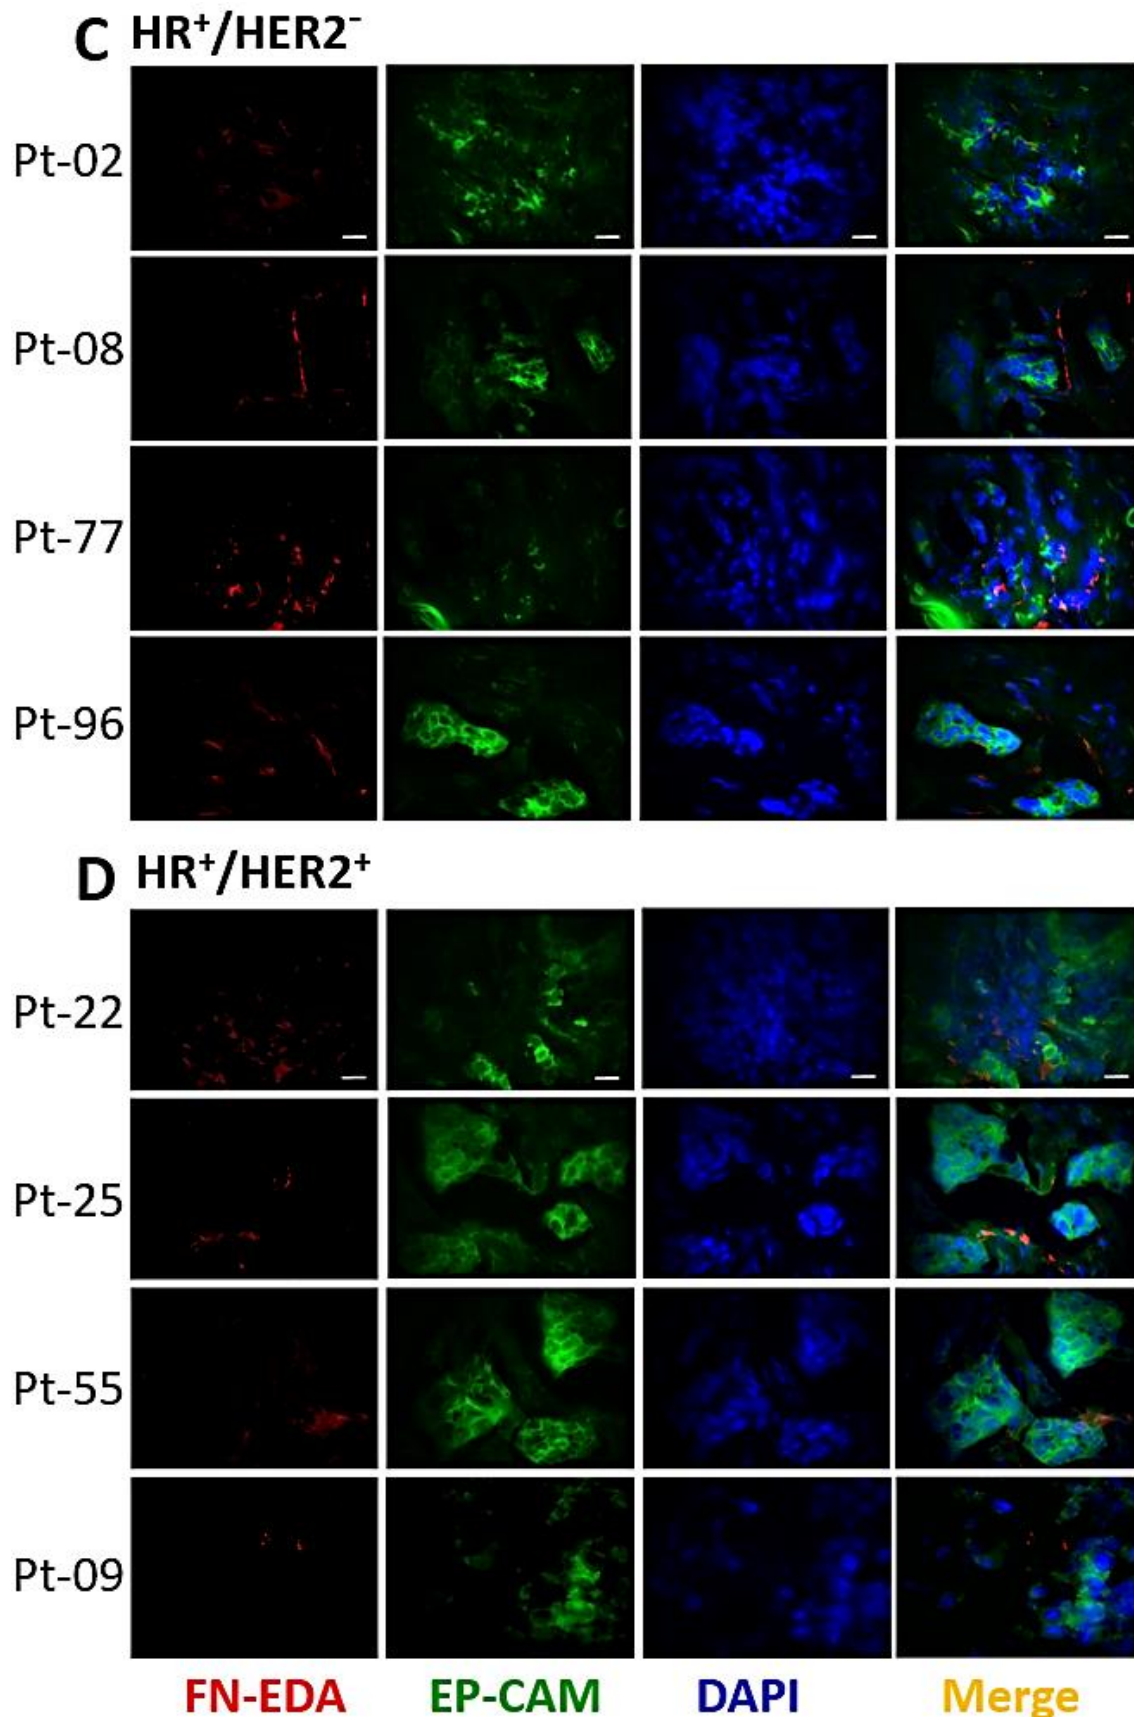

**Suppl. Fig. 3.** Immunofluorescence analysis of FN-EDA in the breast tumor specimens. Micrographs from four patients who were diagnosed with (A) hormone receptor (HR)-negative, HER2-negative (triple negative breast cancer), (B) HR-negative, HER2-positive, (C) HR-positive, HER2-negative, and (D) HR-positive, HER2-positive breast cancer are demonstrated. Epithelial cells are labelled with epithelial cellular adhesion molecule (EpCAM). Please note the co-expression of FN-EDA and EpCAM (appears in yellow color on merged images) in epithelial cells from (A) triple negative breast cancer specimens. Scale bar, 10  $\mu$ m.

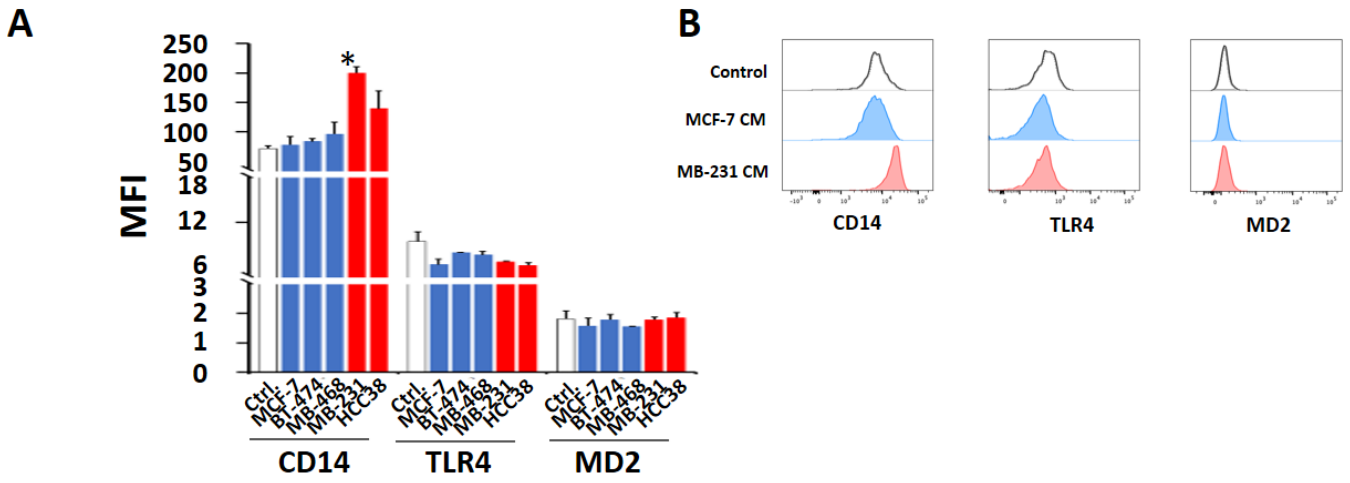

**Suppl. Fig. 4.** Expression of CD14, TLR4 and MD2 molecules on the monocytes incubated with the conditioned media (CM) from different breast cancer cell lines. **A)** Median fluorescence intensity (MFI) values and **(B)** representative flow cytometry offset plots are shown. (Ctrl., monocytes incubated in the control media; blue bars, CM from low-level fibronectin-expressing cell lines; red bars, CM from high-level fibronectin-expressing cell lines; Mean±SEM, Student's t-test; \*,  $P < 0.05$ )



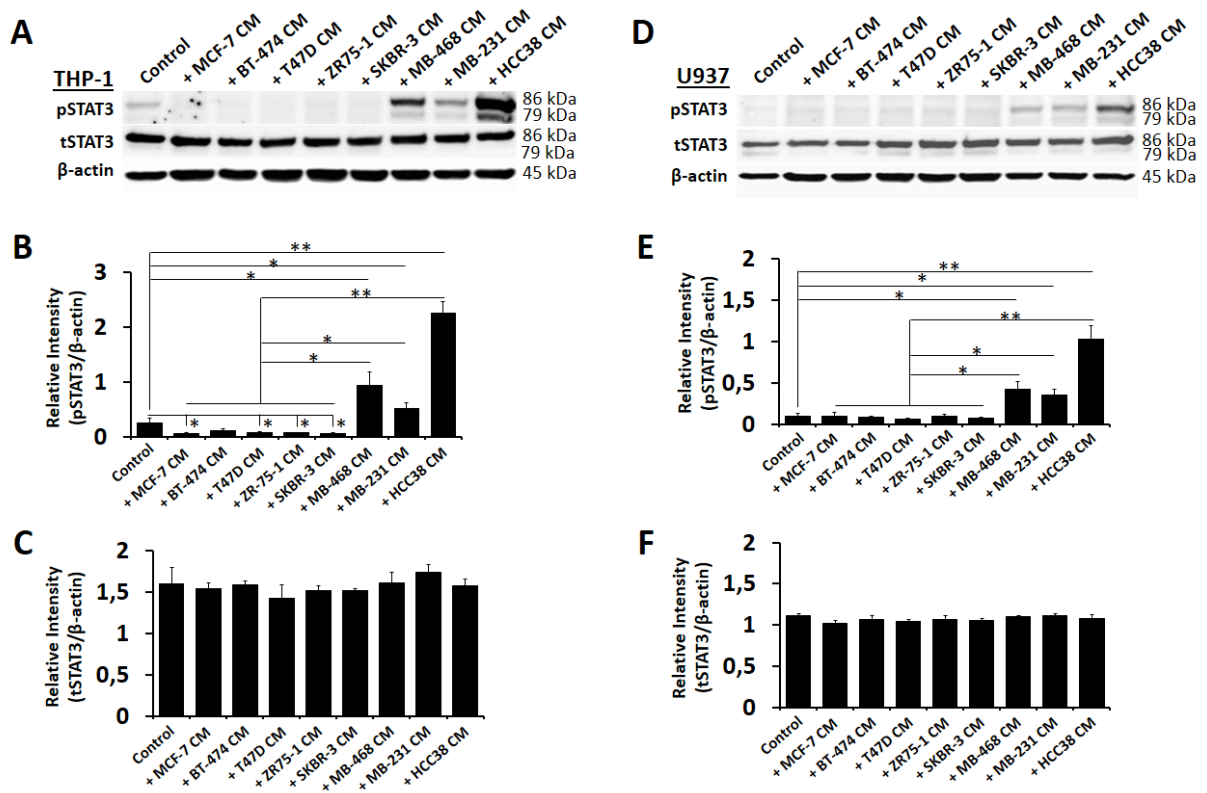

**Suppl. Fig. 6.** Activation of STAT3 pathway in myeloid (A-C) THP-1 and (D-F) U937 cell lines following the incubation with conditioned media (CM) from breast cancer cell lines. (A,D) Representative Western-Blot images and band intensities of (B,E) pSTAT3 and (C,F) total STAT3 protein normalized according to  $\beta$ -actin are shown. (pSTAT3, phospho-STAT3 (Tyr705); total STAT3, tSTAT3; Mean $\pm$ SEM, Student's t-test; \*,  $P < 0.05$  \*\*,  $P < 0.01$ )

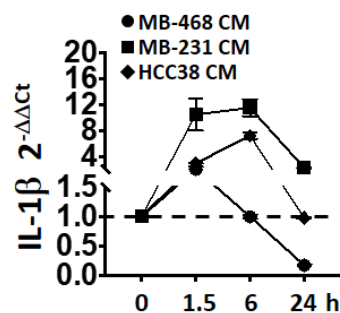

**Suppl. Fig. 7.** Change in IL-1 $\beta$  gene expression in the THP-1 cells treated with the conditioned media (CM) collected from triple-negative breast cancer cells. The data were normalized to the control THP-1 cells cultured in standard media. The dashed line crossing at 2 $^{-\Delta\Delta C_t} = 1$  represents an equal expression level between the control and CM-treated cells.

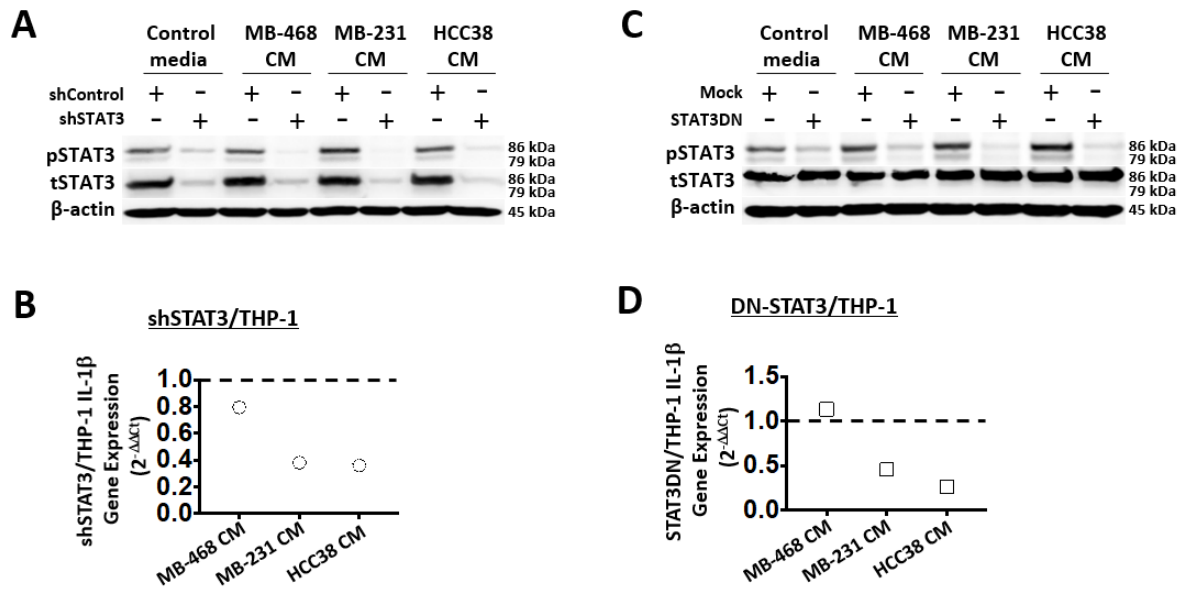

**Suppl. Fig. 8.** IL-1 $\beta$  gene expression analysis in STAT3 silenced THP-1 cells treated with the breast cancer conditioned media (CM). THP-1 cells were genetically-modified with **(A)** short-hairpin (sh)STAT3 or **(C)** dominant-negative (DN) STAT3 constructs and treated with the CM. pSTAT3 (phospho-STAT3 Tyr705) and tSTAT3 (total STAT3) protein levels were studied by Western-Blot. Change in IL-1 $\beta$  gene expression in **(B)** the shSTAT3-modified and in **(D)** the DN-STAT3-modified THP-1 cells treated with the conditioned media (CM) collected from triple-negative breast cancer cells. The data from the shControl plasmid-modified THP-1 cells and the mock-transfected THP-1 cells were used for the normalization of shSTAT3-modified THP-1 cells and for the DN-STAT3-modified THP-1 cells, respectively. The dashed line crossing at  $2^{-\Delta\Delta C_t} = 1$  represents an equal expression level between the control cells and the STAT3-modified cells.
